# Supplementary material for: The Role of Tenascin-C on the Structural Plasticity of Perineuronal Nets and Synaptic Expression in the Hippocampus of Male Mice
Source: MDPI journal article supplement (doi:10.3390/biom14040508), 2024-04-22
Supplement: s1 [file s1]

# The Role of Tenascin-C on the Structural Plasticity of Perineuronal Nets and Synaptic Expression in the Hippocampus of Male Mice

Ana Jakovljević <sup>1</sup>, Vera Stamenković <sup>2</sup>, Joko Poleksić <sup>3</sup>, Mohammad I.K. Hamad <sup>4</sup>, Gebhard Reiss <sup>5</sup>, Igor Jakovcevski <sup>5,\*</sup> and Pavle R. Andjus <sup>1,\*</sup>

\* Correspondence: pandjus@bio.bg.ac.rs (P.A.), igor.jakovcevski@uni-wh.de (I.J.)  
Tel: +381-11-3032356 (P.A.), +49-2302-926-78663 (I.J.)

**Supplementary Table S1.** Acquisition settings used for confocal fluorescence imaging.

| Experimental setup of confocal fluorescence microscopy |                 |              |            |       |                         |                  |               |                  |
|--------------------------------------------------------|-----------------|--------------|------------|-------|-------------------------|------------------|---------------|------------------|
|                                                        | Objective       | Laser Unit   |            |       |                         | Channel settings |               |                  |
|                                                        |                 | Laser source | Wavelength | Power | Excitation transmission | Pinhole          | Detector gain | Amplifier Offset |
| <b>WFA</b>                                             | Plan-Neofluar   | Argon        | 488 nm     | 30 mW | 35%                     | 4 µm             | 672           | -0.3             |
| <b>PV</b>                                              | 40x/1.30 Oil    | HeNe1        | 543 nm     | 1 mW  | 30%                     |                  | 691           | -0.3             |
| <b>WFA</b>                                             | Plan-Apochromat | Argon        | 488 nm     | 30 mW | 35%                     | 2.2 µm           | 790           | -0.3             |
| <b>VGAT</b>                                            | 63x/1.4 Oil     | HeNe1        | 543 nm     | 1 mW  | 30%                     |                  | 763           | -0.3             |
| <b>VGLUT1</b>                                          |                 | HeNe2        | 633 nm     | 5 mW  | 30%                     |                  | 866           | -0.3             |

**Supplementary Table S2.** Number of investigated PNNs and PV cells in the four subfields of the hippocampus

| Group      | Number of<br>investigated PNNs | Number of<br>investigated PV+<br>cells | Number of<br>investigated PNNs<br>for ultrastructure<br>analysis | Number of<br>investigated<br>PNNs with<br>VGAT and<br>VGLUT1 puncta |
|------------|--------------------------------|----------------------------------------|------------------------------------------------------------------|---------------------------------------------------------------------|
| <i>DG</i>  |                                |                                        |                                                                  |                                                                     |
| TnC +/+ SE | 64                             | 58                                     | 23                                                               | 14                                                                  |
| TnC +/+ EE | 70                             | 55                                     | 23                                                               | 15                                                                  |
| TnC -/- SE | 77                             | 49                                     | 23                                                               | 17                                                                  |
| TnC -/- EE | 58                             | 57                                     | 23                                                               | 16                                                                  |
| <i>CA1</i> |                                |                                        |                                                                  |                                                                     |
| TnC +/+ SE | 81                             | 86                                     | 36                                                               | 20                                                                  |
| TnC +/+ EE | 101                            | 98                                     | 36                                                               | 16                                                                  |
| TnC -/- SE | 90                             | 68                                     | 36                                                               | 17                                                                  |
| TnC -/- EE | 95                             | 99                                     | 36                                                               | 16                                                                  |
| <i>CA2</i> |                                |                                        |                                                                  |                                                                     |
| TnC +/+ SE | 48                             | 44                                     | 23                                                               | 17                                                                  |
| TnC +/+ EE | 75                             | 59                                     | 23                                                               | 17                                                                  |
| TnC -/- SE | 90                             | 65                                     | 23                                                               | 14                                                                  |
| TnC -/- EE | 78                             | 57                                     | 23                                                               | 16                                                                  |
| <i>CA3</i> |                                |                                        |                                                                  |                                                                     |
| TnC +/+ SE | 88                             | 84                                     | 14                                                               | 18                                                                  |
| TnC +/+ EE | 91                             | 91                                     | 14                                                               | 18                                                                  |
| TnC -/- SE | 101                            | 104                                    | 14                                                               | 17                                                                  |
| TnC -/- EE | 92                             | 91                                     | 14                                                               | 18                                                                  |

**Supplementary Table S3.** Results of statistical tests for every parameter in the four hippocampal subregions DG, CA1, CA2 and CA3.

| Measured parameter                                              | DG                            | CA1                           | CA2                                                                        | CA3                    |
|-----------------------------------------------------------------|-------------------------------|-------------------------------|----------------------------------------------------------------------------|------------------------|
| <b>Statistical test:</b>                                        |                               |                               |                                                                            |                        |
| <b>Two-way ANOVA, F value, degrees of freedom (df), p value</b> |                               |                               |                                                                            |                        |
| <b>PNN intensity</b>                                            | Genotype                      | Genotype                      | Genotype                                                                   | Genotype               |
|                                                                 | F (1,46) = 4.638              | F (1,47) = 1.017              | F (1,45) = 0.731                                                           | F (1,45) = 0.367       |
|                                                                 | p = 0.037                     | p = 0.319                     | p = 0.397                                                                  | p = 0.548              |
|                                                                 | No <i>post hoc</i> difference | Environment                   | Environment                                                                | Environment            |
|                                                                 | Environment                   | F (1,47) = 1.505              | F (1,45) = 0.501                                                           | F (1,45) = 0.425       |
|                                                                 | F (1,46) = 2.177              | p = 0.226                     | p = 0.483                                                                  | p = 0.518              |
|                                                                 | p = 0.147                     | Genotype x Environment        | Genotype x Environment                                                     | Genotype x Environment |
| <b>PNN number</b>                                               | Genotype                      | Genotype                      | Genotype                                                                   | Genotype               |
|                                                                 | F (1,45) = 0.031              | F (1,46) = 0.139              | F (1,45) = 8.694                                                           | F (1,45) = 0.021       |
|                                                                 | p = 0.861                     | p = 0.711                     | p = 0.005                                                                  | p = 0.885              |
|                                                                 | Environment                   | Environment                   | <b>Tukey <i>post hoc</i> test<br/>TnC+/+ SE vs. TnC-/-SE<br/>p = 0.002</b> | Environment            |
|                                                                 | F (1,45) = 0.456              | F (1,46) = 0.459              |                                                                            | F (1,45) = 0.133       |
|                                                                 | p = 0.503                     | p = 0.502                     |                                                                            | p = 0.717              |
|                                                                 | Genotype x Environment        | Genotype x Environment        |                                                                            | Genotype x Environment |
|                                                                 | F (1,45) = 3.102              | F (1,46) = 0.291              |                                                                            | F (1,45) = 0.613       |
|                                                                 | p = 0.085                     | p = 0.593                     |                                                                            | p = 0.438              |
| <b>PNN+/PV+ intensity</b>                                       | Genotype                      | Genotype                      | Genotype                                                                   | Genotype               |
|                                                                 | F (1,42) = 5.482              | F (1,45) = 4.910              | F (1,43) = 0.728                                                           | F (1,45) = 0.212       |
|                                                                 | p = 0.024                     | p = 0.032                     | p = 0.399                                                                  | p = 0.648              |
|                                                                 | No <i>post hoc</i> difference | No <i>post hoc</i> difference | Environment                                                                | Environment            |
|                                                                 | Environment                   | Environment                   | F (1,43) = 0.236                                                           | F (1,45) = 0.538       |
|                                                                 | F (1,42) = 0.499              | F (1,45) = 0.301              | p = 0.630                                                                  | p = 0.468              |
|                                                                 | p = 0.484                     | p = 0.586                     | Genotype x Environment                                                     | Genotype x Environment |
| <b>PNN+/PV+ number</b>                                          | Genotype                      | Genotype                      | Genotype                                                                   | Genotype               |
|                                                                 | F (1,42) = 0.584              | F (1,45) = 0.022              | F (1,43) = 0.158                                                           | F (1,45) = 0.601       |
|                                                                 | p = 0.449                     | p = 0.883                     | p = 0.693                                                                  | p = 0.443              |
|                                                                 | Environment                   | Environment                   | Environment                                                                | Environment            |
|                                                                 | F (1,42) = 0.499              | F (1,45) = 0.301              | F (1,43) = 0.236                                                           | F (1,45) = 0.538       |
|                                                                 | p = 0.484                     | p = 0.586                     | p = 0.630                                                                  | p = 0.468              |
|                                                                 | Genotype x Environment        | Genotype x Environment        | Genotype x Environment                                                     | Genotype x Environment |
| <b>PNN+/PV+ number</b>                                          | Genotype                      | Genotype                      | Genotype                                                                   | Genotype               |
|                                                                 | F (1,46) = 0.006              | F (1,46) = 0.011              | F (1,45) = 1.435                                                           | F (1,45) = 0.113       |
|                                                                 | p = 0.939                     | p = 0.917                     | p = 0.238                                                                  | p = 0.739              |
|                                                                 | Environment                   | Environment                   | Environment                                                                | Environment            |
|                                                                 | F (1,46) = 0.315              | F (1,46) = 0.011              | F (1,45) = 0.000                                                           | F (1,45) = 0.245       |
|                                                                 | p = 0.577                     | p = 0.917                     | p = 1.000                                                                  | p = 0.623              |
|                                                                 | Genotype x Environment        | Genotype x Environment        | Genotype x Environment                                                     | Genotype x Environment |
| <b>PNN+/PV+ number</b>                                          | Genotype                      | Genotype                      | Genotype                                                                   | Genotype               |
|                                                                 | F (1,46) = 0.594              | F (1,46) = 0.044              | F (1,45) = 0.283                                                           | F (1,45) = 0.400       |
|                                                                 | p = 0.445                     | p = 0.834                     | p = 0.597                                                                  | p = 0.531              |
|                                                                 | Environment                   | Environment                   | Environment                                                                | Environment            |
|                                                                 | F (1,46) = 0.315              | F (1,46) = 0.011              | F (1,45) = 0.000                                                           | F (1,45) = 0.245       |
|                                                                 | p = 0.577                     | p = 0.917                     | p = 1.000                                                                  | p = 0.623              |
|                                                                 | Genotype x Environment        | Genotype x Environment        | Genotype x Environment                                                     | Genotype x Environment |

|                                                                  |                                                                                                                                                                                                                                                   |                                                                                                                                                         |                                                                                                                                                                                                                                                                                                                                         |                                                                                                                                                         |
|------------------------------------------------------------------|---------------------------------------------------------------------------------------------------------------------------------------------------------------------------------------------------------------------------------------------------|---------------------------------------------------------------------------------------------------------------------------------------------------------|-----------------------------------------------------------------------------------------------------------------------------------------------------------------------------------------------------------------------------------------------------------------------------------------------------------------------------------------|---------------------------------------------------------------------------------------------------------------------------------------------------------|
| <b>PNN+/PV-intensity</b>                                         | Genotype<br>F (1,40) = 1.240<br>p = 0.273<br>Environment<br>F (1,40) = 6.408<br>p = 0.016<br><b>Tukey post hoc test</b><br><b>TnC+/+ EE vs.</b><br><b>TnC+/+ SE</b><br><b>p=0.017</b><br>Genotype x<br>Environment F (1,40)<br>= 3.737, p = 0.061 | Genotype<br>F (1,44) = 0.008<br>p = 0.929<br>Environment<br>F (1,44) = 0.064<br>p = 0.902<br>Genotype x<br>Environment<br>F (1,44) = 0.160<br>p = 0.691 | Genotype<br>F (1,41) = 0.640<br>p = 0.429<br>Environment<br>F (1,41) = 0.797<br>p = 0.377<br>Genotype x<br>Environment<br>F (1,41) = 0.003<br>p = 0.954                                                                                                                                                                                 | Genotype<br>F (1,42) = 1.830<br>p = 0.184<br>Environment<br>F (1,42) = 0.004<br>p = 0.953<br>Genotype x<br>Environment<br>F (1,42) = 1.449<br>p = 0.236 |
| <b>PNN+/PV- number</b>                                           | Genotype<br>F (1,46) = 0.243<br>p = 0.625<br>Environment<br>F (1,46) = 0.243<br>p = 0.625<br>Genotype x<br>Environment<br>F (1,46) = 1.727<br>p = 0.196                                                                                           | Genotype<br>F (1,47) = 0.249<br>p = 0.620<br>Environment<br>F (1,47) = 0.390<br>p = 0.536<br>Genotype x<br>Environment<br>F (1,47) = 0.249<br>p = 0.620 | Genotype<br>F (1,45) = 9.612<br>p = 0.003<br><b>Tukey post hoc test</b><br><b>TnC+/+ SE vs. TnC-</b><br><b>/-SE</b><br><b>p&lt;0.001</b><br>Environment<br>F (1,45) = 0.736<br>p = 0.396<br>Genotype x<br>Environment<br>F (1,45) = 11.356<br>p = 0.002<br><b>Tukey post hoc test</b><br><b>TnC-/ EE vs. TnC-/</b><br><b>SE p=0.023</b> | Genotype<br>F (1,45) = 0.285<br>p = 0.596<br>Environment<br>F (1,45) = 0.023<br>p = 0.879<br>Genotype x<br>Environment<br>F (1,45) = 0.023<br>p = 0.879 |
| <b>PV+/PNN- number</b>                                           | Genotype<br>F (1,46) = 0.591<br>p = 0.446<br>Environment<br>F (1,46) = 0.322<br>p = 0.573<br>Genotype x<br>Environment F (1,46)<br>= 2.092<br>p = 0.155                                                                                           | Genotype<br>F (1,47) = 2.279<br>p = 0.138<br>Environment<br>F (1,47) = 2.693<br>p = 0.108<br>Genotype x<br>Environment<br>F (1,47) = 2.279<br>p = 0.138 | Genotype<br>F (1,45) = 0.035<br>p = 0.852<br>Environment<br>F (1,45) = 0.162<br>p = 0.689<br>Genotype x<br>Environment<br>F (1,45) = 0.950<br>p = 0.335                                                                                                                                                                                 | Genotype<br>F (1,45) = 0.285<br>p = 0.596<br>Environment<br>F (1,45) = 0.022<br>p = 0.882<br>Genotype x<br>Environment<br>F (1,45) = 0.384<br>p = 0.539 |
| <b>PV+ number</b>                                                | Genotype<br>F (1,46) = 0.021<br>p = 0.886<br>Environment<br>F (1,46) = 0.086<br>p = 0.771<br>Genotype x<br>Environment<br>F (1,46) = 0.339<br>p = 0.564                                                                                           | Genotype<br>F (1,46) = 0.488<br>p = 0.489<br>Environment<br>F (1,46) = 0.934<br>p = 0.339<br>Genotype x<br>Environment<br>F (1,46) = 2.090<br>p = 0.156 | Genotype<br>F (1,46) = 0.758<br>p = 0.389<br>Environment<br>F (1,46) = 0.030<br>p = 0.863<br>Genotype x<br>Environment<br>F (1,46) = 1.216<br>p = 0.276                                                                                                                                                                                 | Genotype<br>F (1,46) = 0.758<br>p = 0.389<br>Environment<br>F (1,46) = 0.030<br>p = 0.863<br>Genotype x<br>Environment<br>F (1,46) = 1.216<br>p = 0.276 |
| <b>Statistical test:</b>                                         |                                                                                                                                                                                                                                                   |                                                                                                                                                         |                                                                                                                                                                                                                                                                                                                                         |                                                                                                                                                         |
| <b>Kruskal Wallis, H value, degrees of freedom (df), p value</b> |                                                                                                                                                                                                                                                   |                                                                                                                                                         |                                                                                                                                                                                                                                                                                                                                         |                                                                                                                                                         |
| <b>Nodes number in</b>                                           | <b>H(3) = 15.761</b>                                                                                                                                                                                                                              | <b>H(3) = 1.637</b>                                                                                                                                     | <b>H(3) = 5.769</b>                                                                                                                                                                                                                                                                                                                     | <b>H(3) = 0.826</b>                                                                                                                                     |
| <b>PNN mesh</b>                                                  | <b>p = 0.001</b>                                                                                                                                                                                                                                  | <b>p = 0.651</b>                                                                                                                                        | <b>p = 0.123</b>                                                                                                                                                                                                                                                                                                                        | <b>p = 0.843</b>                                                                                                                                        |
| <b>Dunn post hoc test</b>                                        |                                                                                                                                                                                                                                                   |                                                                                                                                                         |                                                                                                                                                                                                                                                                                                                                         |                                                                                                                                                         |

|                                             | <b>TnC+/+ SE vs. TnC-/- SE <math>p = 0.001</math></b><br><b>TnC-/- SE vs. TnC-/- EE <math>p = 0.026</math></b>                                                                                       |                             |                                                                                                                                                                                                      |                                                                                                                                                                                                     |
|---------------------------------------------|------------------------------------------------------------------------------------------------------------------------------------------------------------------------------------------------------|-----------------------------|------------------------------------------------------------------------------------------------------------------------------------------------------------------------------------------------------|-----------------------------------------------------------------------------------------------------------------------------------------------------------------------------------------------------|
| <b>Nodes percentage in PNN mesh</b>         | H(3) = 6.934<br>$p = 0.074$                                                                                                                                                                          | H(3) = 4.373<br>$p = 0.224$ | H(3) = 3.646<br>$p = 0.302$                                                                                                                                                                          | H(3) = 4.668<br>$p = 0.198$                                                                                                                                                                         |
| <b>Nodes connectivity degree</b>            | H(3) = 4.862<br>$p = 0.182$                                                                                                                                                                          | H(3) = 2.551<br>$p = 0.466$ | H(3) = 4.918<br>$p = 0.178$                                                                                                                                                                          | H(3) = 6.878<br>$p = 0.076$                                                                                                                                                                         |
| <b>Average distance between nodes</b>       | H(3) = 4.576<br>$p = 0.206$                                                                                                                                                                          | H(3) = 4.410<br>$p = 0.221$ | H(3) = 3.064<br>$p = 0.382$                                                                                                                                                                          | H(3) = 4.497<br>$p = 0.213$                                                                                                                                                                         |
| <b>Maximal distance between nodes - R95</b> | H(3) = 7.136<br>$p = 0.068$                                                                                                                                                                          | H(3) = 4.322<br>$p = 0.229$ | H(3) = 3.559<br>$p = 0.313$                                                                                                                                                                          | H(3) = 2.013<br>$p = 0.570$                                                                                                                                                                         |
| <b>VGAT density</b>                         | <b>H(3) = 9.436</b><br><b><math>p = 0.024</math></b><br><b>Dunn post hoc test</b><br><b>TnC+/+ SE vs. TnC-/- SE <math>p = 0.014</math></b><br><b>TnC+/+ SE vs. TnC+/+ EE <math>p = 0.037</math></b>  | H(3) = 1.588<br>$p = 0.662$ | <b>H(3) = 9.597</b><br><b><math>p = 0.022</math></b><br><b>Dunn post hoc test</b><br><b>TnC+/+ SE vs. TnC+/+ EE <math>p = 0.004</math></b><br><b>TnC+/+ EE vs. TnC-/- EE <math>p = 0.017</math></b>  | <b>H(3) = 8.012</b><br><b><math>p = 0.046</math></b><br><b>Dunn post hoc test</b><br><b>TnC+/+ SE vs. TnC+/+ EE <math>p = 0.016</math></b><br><b>TnC+/+ EE vs. TnC-/- EE <math>p = 0.016</math></b> |
| <b>VGAT size</b>                            | H(3) = 5.183<br>$p = 0.159$                                                                                                                                                                          | H(3) = 5.376<br>$p = 0.146$ | H(3) = 5.521<br>$p = 0.137$                                                                                                                                                                          | H(3) = 4.730<br>$p = 0.193$                                                                                                                                                                         |
| <b>VGAT intensity</b>                       | H(3) = 0.218<br>$p = 0.975$                                                                                                                                                                          | H(3) = 4.668<br>$p = 0.198$ | <b>H(3) = 10.605</b><br><b><math>p = 0.014</math></b><br><b>Dunn post hoc test</b><br><b>TnC+/+ SE vs. TnC-/- SE <math>p = 0.015</math></b><br><b>TnC+/+ EE vs. TnC-/- EE <math>p = 0.044</math></b> | H(3) = 2.453<br>$p = 0.484$                                                                                                                                                                         |
| <b>VGLUT1 density</b>                       | <b>H(3) = 7.569</b><br><b><math>p = 0.056</math></b><br><b>Dunn post hoc test</b><br><b>TnC-/- SE vs. TnC-/- EE <math>p = 0.011</math></b>                                                           | H(3) = 2.065<br>$p = 0.559$ | H(3) = 3.423<br>$p = 0.331$                                                                                                                                                                          | H(3) = 6.035<br>$p = 0.110$                                                                                                                                                                         |
| <b>VGLUT1 size</b>                          | H(3) = 1.868<br>$p = 0.600$                                                                                                                                                                          | H(3) = 2.039<br>$p = 0.564$ | H(3) = 4.342<br>$p = 0.227$                                                                                                                                                                          | H(3) = 2.658<br>$p = 0.447$                                                                                                                                                                         |
| <b>VGLUT1 intensity</b>                     | <b>H(3) = 11.646</b><br><b><math>p = 0.009</math></b><br><b>Dunn post hoc test</b><br><b>TnC-/- SE vs. TnC-/- EE <math>p = 0.005</math></b><br><b>TnC+/+ SE vs. TnC-/- SE <math>p = 0.005</math></b> | H(3) = 0.103<br>$p = 0.991$ | H(3) = 6.465<br>$p = 0.091$                                                                                                                                                                          | H(3) = 2.056<br>$p = 0.561$                                                                                                                                                                         |

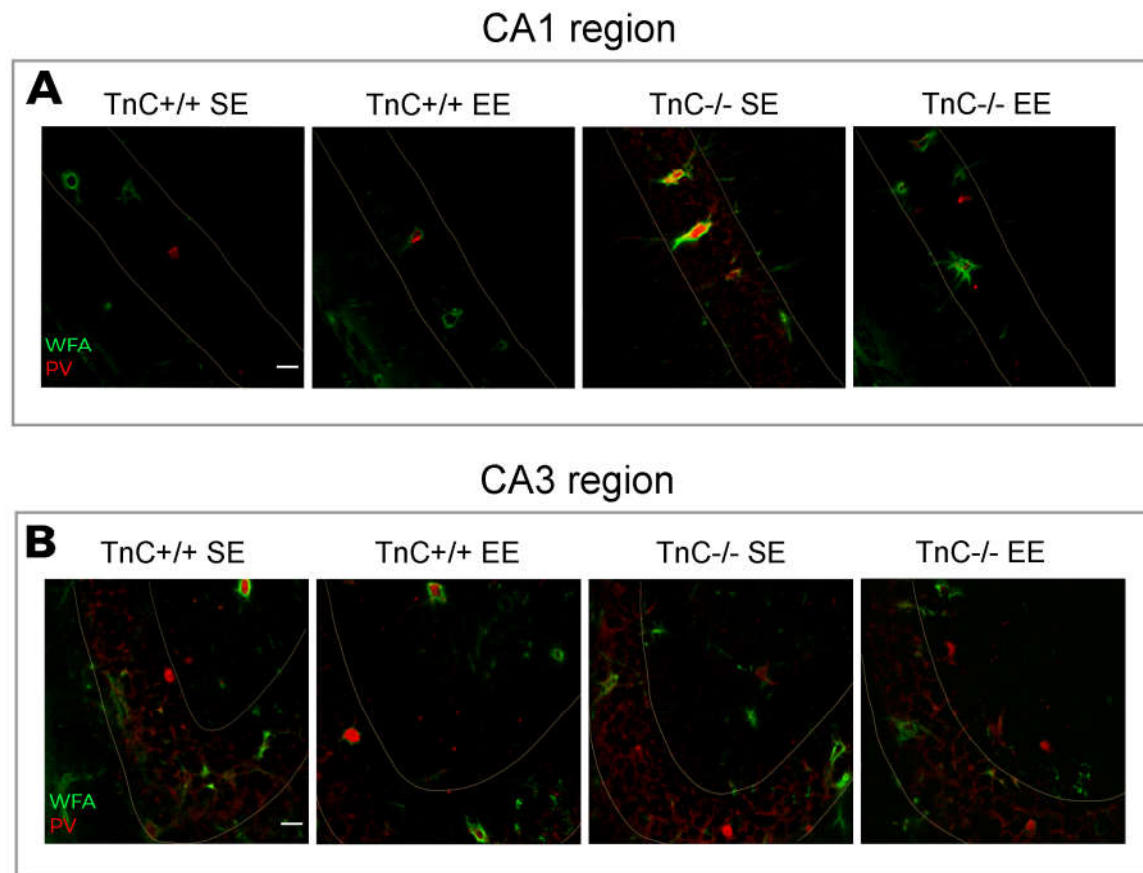

**Supplementary Figure S1.** Expression of PNNs and PV+ neurons in the region of CA1 and CA3 in TnC+/+ and TnC-/- mice after exposure to SE and EE. (**a, b**) Representative confocal images shows double immunofluorescent staining for PNN marker WFA (green). Pyramidal layer of CA regions is delineated with light yellow line. Scale bar (**a**): 50  $\mu$ m.

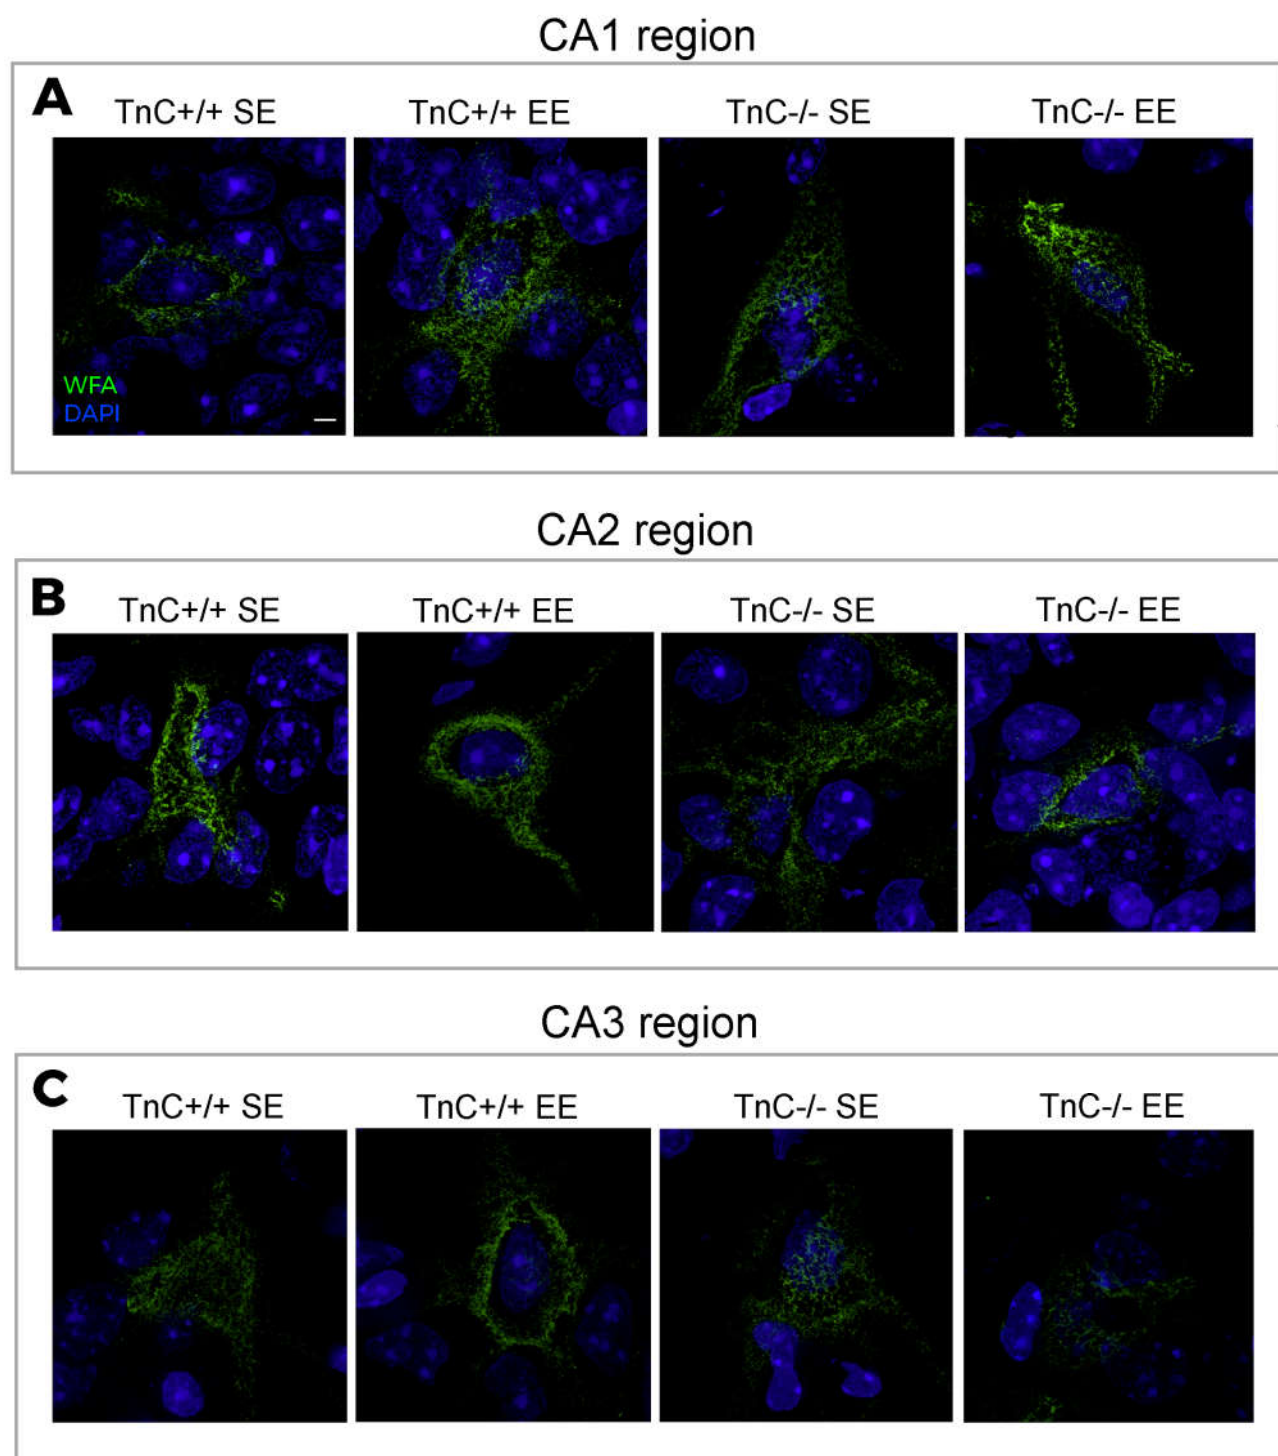

**Supplementary Figure S2.** Ultrastructure of PNN in the CA1 (a), CA2 (b) and CA3 (c) in the hippocampus of TnC+/+ and TnC-/- mice after exposure to SE and EE. Representative 3D super-resolution images from SIM shows double immunofluorescent staining for PNN marker WFA (green) and DAPI (blue). Scale bar (a): 3  $\mu$ m.

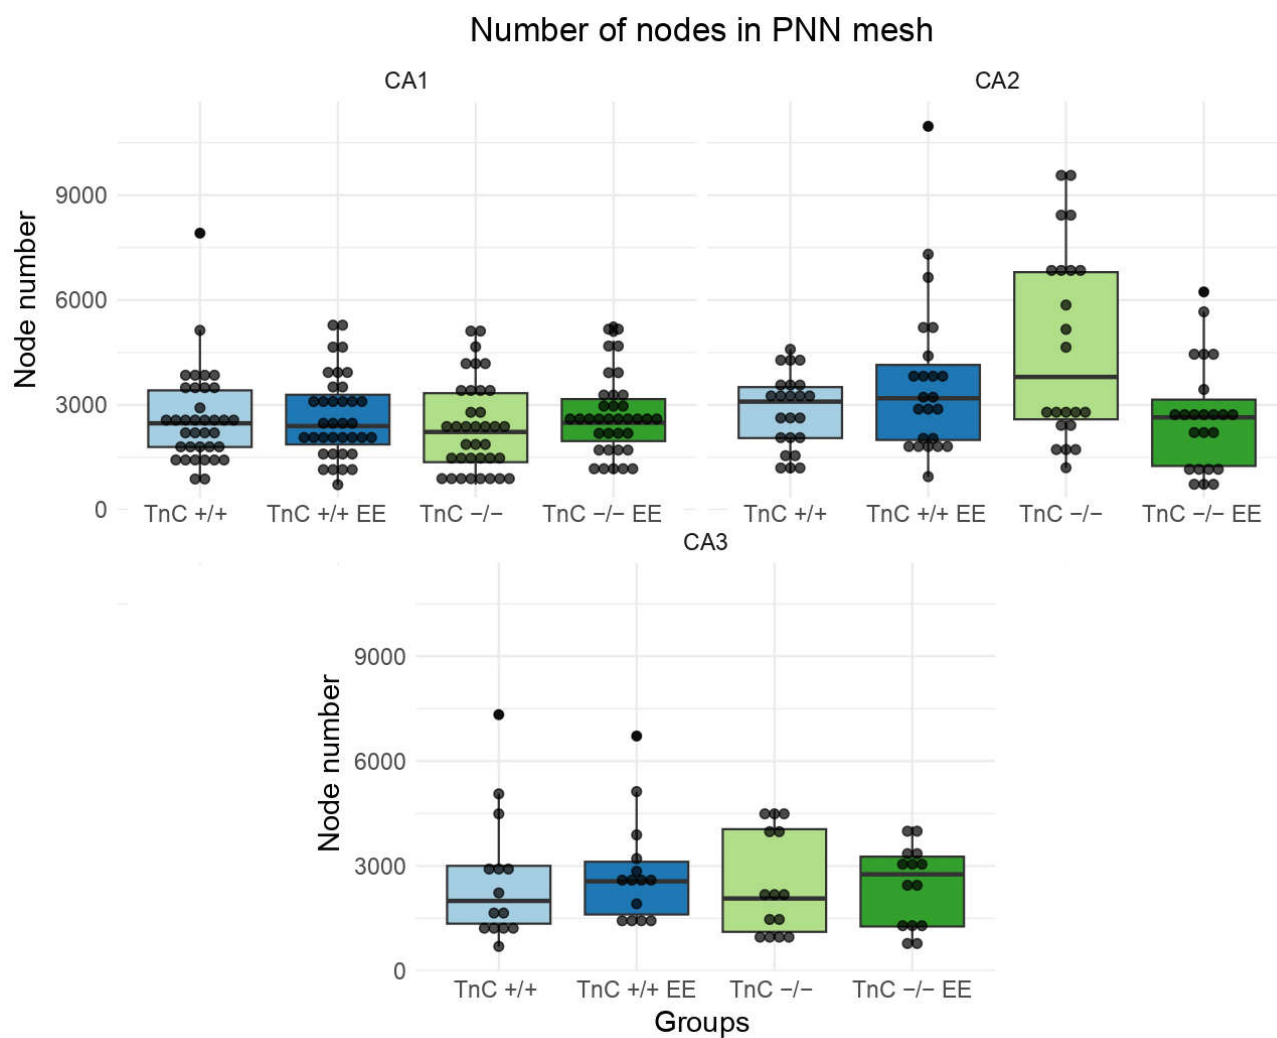

**Supplementary Figure S3.** Quantification of PNNs ultrastructure in the four subfields of the hippocampus of TnC+/+ and TnC-/- mice after exposure to SE and EE. Box plots represents median number of nodes in PNN mesh (4 animals/experimental group, 3 brain section/animal), whiskers extending from the box are indicating range of data within 1.5 times the interquartile range. No significant difference between groups is found.



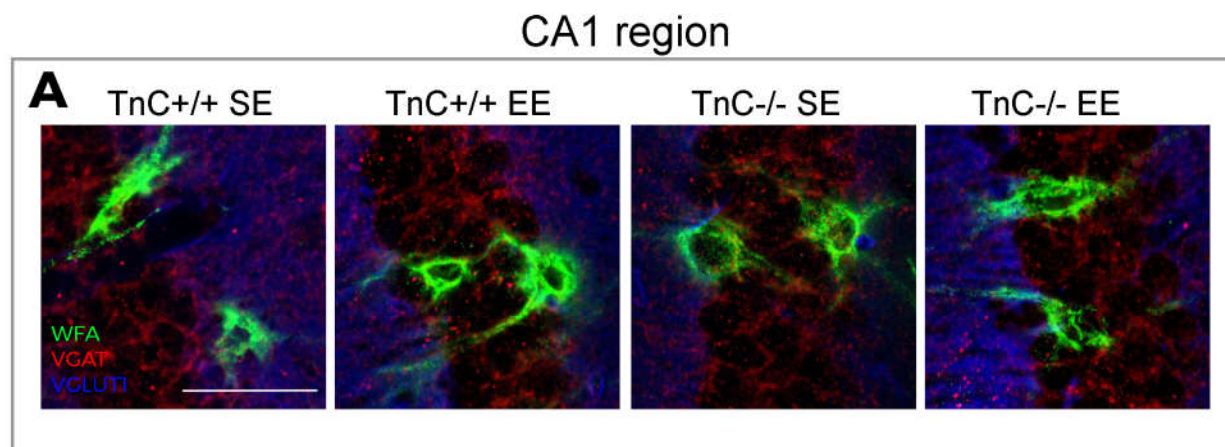

**Supplementary Figure S4.** Expression of inhibitory and excitatory synapses in the CA1 region in the hippocampus of TnC+/+ and TnC-/- mice after exposure to SE and EE. **(a)** Representative 3D confocal images from shows triple immunofluorescent staining for PNN marker WFA (green), inhibitory marker VGAT (red) and excitatory marker VGLUT1 (blue). Scale bar **(a)**: 50  $\mu$ m.

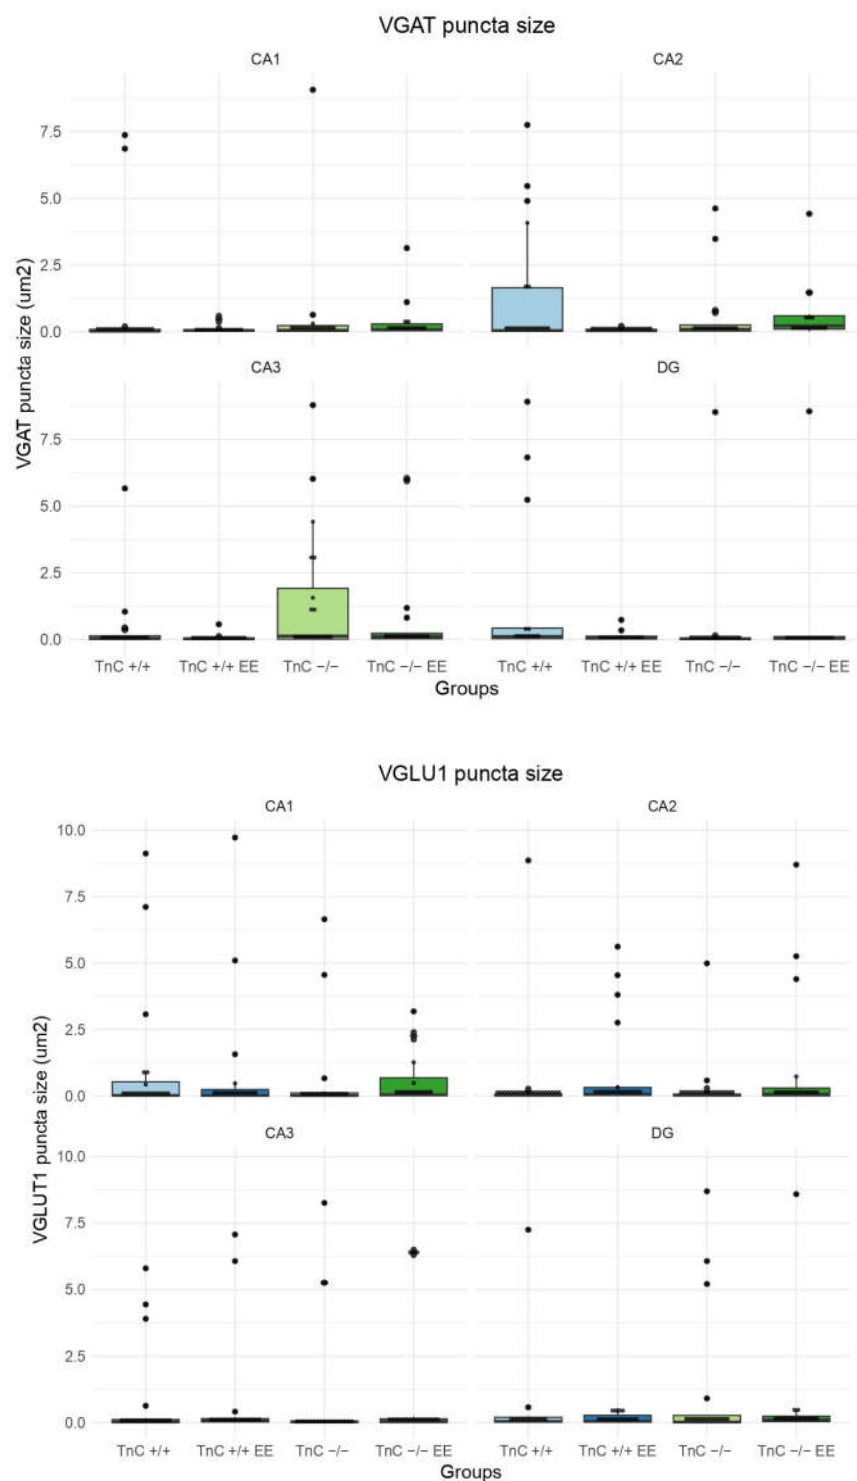

**Supplementary Figure S5.** Quantification of inhibitory and excitatory synapses size in the four subfields of the hippocampus of TnC+/+ and TnC-/- mice after exposure to SE and EE. Box plots represents size of inhibitory and excitatory puncta that are penetrating PNN (3-4 animals/experimental group, 3 brain section/animal), whiskers extending from the box are indicating range of data within 1.5 times the interquartile range. No significant difference between groups is found.
